# Supplementary material for: Identification and Characterization of LARGE EMBRYO, a New Gene Controlling Embryo Size in Rice (Oryza sativa L.)
Source: PubMed Central journal article supplement (PMC6458227; doi:10.1186/s12284-019-0277-y), 2019-04-11

Additional file 2: Figure S1

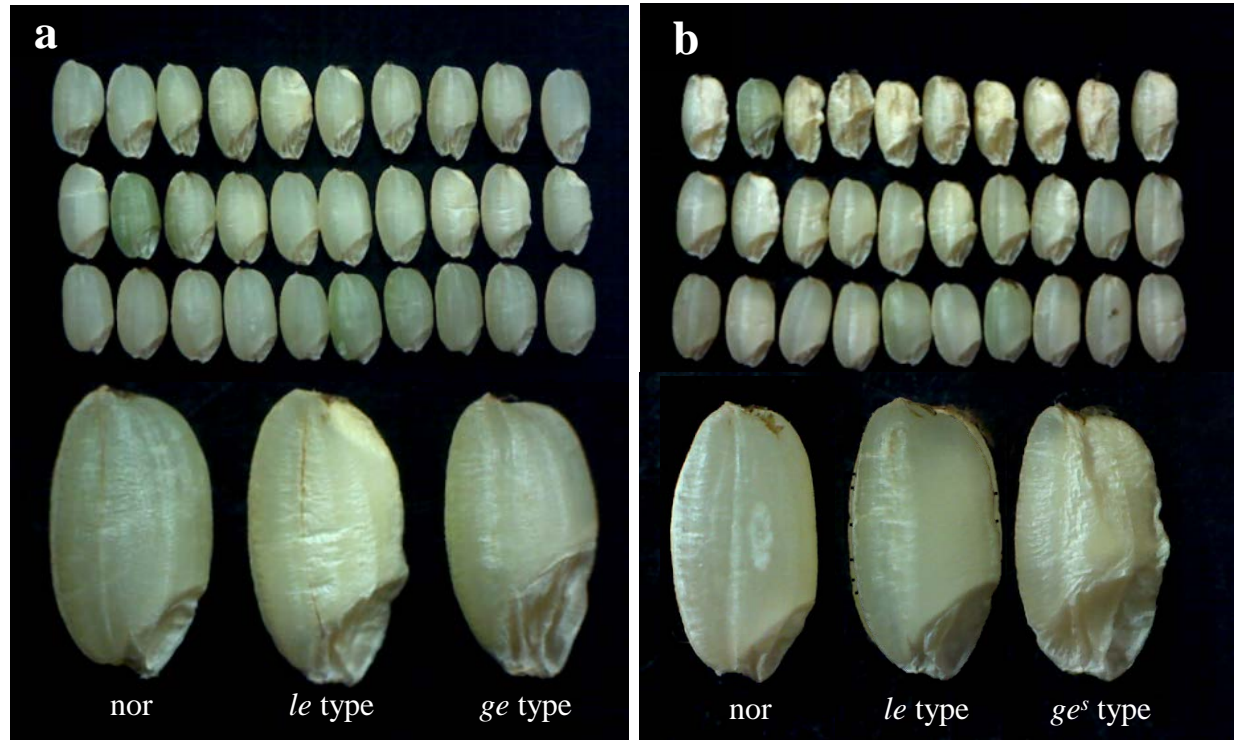

Supplement: 12284_2019_277_MOESM2_ESM.pdf [file 12284_2019_277_MOESM2_ESM.pdf]
