# Supplementary material for: Identification and Characterization of LARGE EMBRYO, a New Gene Controlling Embryo Size in Rice (Oryza sativa L.)
Source: PubMed Central journal article supplement (PMC6458227; doi:10.1186/s12284-019-0277-y), 2019-04-11
Supplement: 12284_2019_277_MOESM3_ESM.pdf [file 12284_2019_277_MOESM3_ESM.pdf]

# Additional file 3: Figure S2

```
OS03g0706900/LE(Os) 1 MQRRAQTWAGVGTQAQAAAAHAALFCFTLLALKVDGRTAYSWWIIFIPLWLFHGIVARGRFSMPAPSLPHGRHWAPCHSIVAAPLLIAFELLCC 96
OS03g0706900/Os(Os) 1 MQRRAQTWAGVGTQAQAAAAHAALFCFTLLALKVDGRTAYSWWIIFIPLWLFHGIVARGRFSMPAPSLPHGRHWAPCHSIVAAPLLIAFELLCC 96
M1FY52(Ta) 1 MQRRAQTWAGVGTQAQAAAAHAALFCFTLLALRVDGRTDSWWIIFIPLWLFHGVAAARGRFSMPAPSLPHGRHWAPCHSIVAAPLLIAFELLCC 96
F2DSD3(Hv) 1 MQRRAQTWAGVGTQAQAAAAHAALFCFTLLALRVDGRTDSWWIIFIPLWLFHGVAAARGRFSMPAPSLPHGRHWAPCHSIVAAPLLIAFELLCC 96
Zm00001d035074(Zm) 1 MQRRRGHTWAGVGTQAQASAAHAALFCFTLLALRVDGRTTYSWWIIFIPLWLFHGIVARGRFSMPAPSLPHGRHWAPCHSIVAAPLLIAFELLCC 96
At1g73950(At) 1 MNCWR - - - - - MLKSVQASVAHCFLFSFTLALVLLKLDHSITYSWWVVCPLWAFHAAVVARGRFSLPAPIAFRNRHWAPCHAVSTPLLIAFELLCC 90
Bra015952(Br) 1 MNCRR - - - - - MLKSVQALSASFLFCFTLVLLKLDHTVYSYWWVVCPLWAFHAAVVSRRGRFSLPAPIAFRNRHWAPCHAVATPLLIAFELLCC 90
LOC100791390(Gm) 1 MSWRR - - - - - MLNSAQALAAHTFLCFTLVLLKLDHNLSCSWWVIFSLWFMHGVVARGRFSLPAPIAFRNRHWAPCHAVIATPLLIAFELLCC 90

OS03g0706900/LE(Os) 97 IYLESRLVKS KPTVDLKIVFLPLLA FEVIILADNFRMCRALMPGDEESMSDEAIWETLPHFWVAISMVFLIAATFTLLKLSGDVGALGWWDLFIN 192
OS03g0706900/Os(Os) 97 IYLESRLVKS KPTVDLKIVFLPLLA FEVIILADNFRMCRALMPGDEESMSDEAIWETLPHFWVAISMVFLIAATFTLLKLSGDVGALGWWDLFIN 192
M1FY52(Ta) 97 IYLESRLVKNHPAVDMKIVFLPLLT FEVIILVDNFRMCRALMPGDEESMSDEAIWETLPHFWVAISMVFLIAATFTLLKLSGDVGALGWWDLFIN 192
F2DSD3(Hv) 97 IYLESRLVKNHPAVDMKIVFLPLLT FEVIILVDNFRMCRALMPGDEESMSDEAIWETLPHFWVAISMVFLIAATFTLLKLSGDVGALGWWDLFIN 192
Zm00001d035074(Zm) 97 IYLESIRVRNHPSFDLKVFLPLLA FEAIILIDNFRMCRALMPGDEESMSDEAIWETLPHFWVAISMVFLIAATFTLLKLSGDVGALGWWDLFIN 192
At1g73950(At) 91 VYLETAYADSPPAVSLKIVFLPLLA FEVIILVDNARMCRALMPGDEESVND EAVWEALPHFWVAISMVFLAATVFTLLKLSGDVAALGWWDLFIN 186
Bra015952(Br) 91 VYLESAAHARWPAVSLKIVFLPLLA FEVTILVDNARMCRALMPGDEESINDEAIWEALPHFWVAISMVFLAATVFTLLKLSGDVAALGWWDLFIN 186
LOC100791390(Gm) 91 IYLESLYDLGYAAVDLKVFLPLLT FEIITLIDNFRMCRALMPGDEESMSDEAIWETLPHFWVAISMVFLIAATVFTLLKLSGDVGALGWWDLFIN 186

OS03g0706900/LE(Os) 193 YGIAECFAFLVCTRWFNPMIHKS PNPGEASSSAAIRYRDWESGLLLPSLEDHEQERLCLGPDIGGHVMKIPLVIIFQVLLCMRLEGTPPSAQYIPI 288
OS03g0706900/Os(Os) 193 YGIAECFAFLVCTRWFNPMIHKS PNPGEASSSAAIRYRDWESGLLLPSLEDHEQERLCLGPDIGGHVMKIPLVIIFQVLLCMRLEGTPPSAQYIPI 288
M1FY52(Ta) 193 YGIAECFAFLVCTRWFNPMIHRPPTHGEASSSAAIRYRDWESGLVLPLEDHEQERLCLGPDIGGHVMKIPLVVIFQVLLCMRLEGTPPSARYIPI 288
F2DSD3(Hv) 193 YGIAECFAFLVCTRWFNPMIHRPPTHGEASSSAAIRYRDWESGLVLPLEDHEQERLCLGPDIGGHVMKIPLVVIFQVLLCMRLEGTPPSARYIPI 288
Zm00001d035074(Zm) 193 YGIAECFAFLVCTRWFNPMIHKS PTHGEASSSAAIRYRDWESGLVLPLEDHEQERLCLGPDIGGHVMKIPLVAIFQVLLCMRLEGTPPSARYIPI 288
At1g73950(At) 187 FGI AECFAFLVCTKWSNPVIHRSSRDRETSSTNIRYLDWN SGLVFS EDDRNOD - TCGLQDIGGHIMKIPLVIIFQVLLCMHLEGTPPEAKSISV 281
Bra015952(Br) 187 FGI AECFAFLVCTKWSNPVIHRGSPVREPGSSSTITRYVVSNSGLSDFSEDDMHODGTCGLQDIGGHIMKIPLVIIFQVLLCMHLEGTPPEAKYIPV 282
LOC100791390(Gm) 187 FAI AECFAFLVCTKWSNPVIHRNSREA - SSSSTTITYLDWN SGLVVS TDENQHQGRMCSLQDIGGHFMKIPLVIIFQVLLCMHLEGTPACAVHIPL 281

OS03g0706900/LE(Os) 289 FALFSPFLFILOGAGVLSLARLEKVVLLLRNGPVS PNYLTISSKVRDCFAFLHRGSRLLGWWS IDEGSKEEQARLFYTESTGYNTFCGYPPPEVVR 384
OS03g0706900/Os(Os) 289 FALFSPFLFILOGAGVLSLARLEKVVLLLRNGPVS PNYLTISSKVRDCFAFLHRGSRLLGWWS IDEGSKEEQARLFYTESTGYNTFCGYPPPEVVR 384
M1FY52(Ta) 289 FALFSPFLFILOGAGVLSIGRLEKVVLLLRNGPVS PNYLTVSSKVRDCFAFLHGGSRLLGWWS IDEGSKEEQARLFYTESTGYNTFCGYPPPEVVK 384
F2DSD3(Hv) 289 FALFSPFLFILOGAGVLSLARLEKVVLLLRNGPVS PNYLTVSSKVRDCFAFLHGGSRLLGWWS IDEGSKEEQARLFYTESTGYNTFCGYPPPEVVK 384
Zm00001d035074(Zm) 289 FALFSPFLFILOGAGVLSLARLEKVVLLLRNGPVS PNYLTVSSKVRDCFAFLHGGSRLLGWWS IDEGSKEEQARLFYTESTGYNTFCGYPPPEVVR 384
At1g73950(At) 282 PVLFSPLFLQGGVGLFAASKIIEKVVLLLRGDDDTGLWFRFLSRAHDCLGFLHGGSRLLGWWS IDEGSKEEQARLYFDQESGYNTFCGHPPPEIVK 377
Bra015952(Br) 283 PVLFSPLFLQGGVGLFAASKIIEKVVLLLRGDDDTGLWFRFLSRAHDCLGFLHGGSRLLGWWS IDEGSKEEQARLYFDQESGYNTFCGHPPPEIVK 378
LOC100791390(Gm) 282 PVI FSPFLFLQGGVML SASKIIEKVVLLLRGAGGGITWFRFLSRAHDCLGFLHGGSRLLGWWS IDEGSKEEQARLYHEGAI GYNTFCGYPPPEIVK 377

*
OS03g0706900/LE(Os) 385 KMPKRD LAEEVWRLQAALGEQSEITKCTKQEFERLONEKVL CRV CYEGEICMVLLPCRRRRLCKTCS DKCKKCPICRVPIEERMPPYVDV - - - 473
OS03g0706900/Os(Os) 385 KMPKRD LAEEVWRLQAALVVE SNOKLPNVP S RNKKGKMRFFVGFATRGRYAWSYFLAGTEHYARLVLS ARNVQS AVCP LKNACPYMMFKLR 476
M1FY52(Ta) 385 KMPKRD LAEEVWRLQAALGEQSEITKSTQOEYERLONEKVL CRV CYEGEICMVLLPCRRRRLCKS CAEKCKRCPICRNPIEERMAVYDV - - - 473
F2DSD3(Hv) 385 KMPKRD LAEEVWRLQAALGEQSEITKSTQOEYERLONEKVL CRV CYEGEICMVLLPCRRRRLCKS CAEKCKRCPICRNPIEERMAVYDV - - - 473
Zm00001d035074(Zm) 385 KMPKRD LAEEVWRLQAALGEQSEITKCTKQEYERLONEKVL CRV CYEGEICMVLLPCRRRRLCKS CAEKCKKCPICRVPIEERMPPYVDV - - - 473
At1g73950(At) 378 KMPKKE LAEEVWRLQAALGEQTEITKFSQOEYERLONEKVL CRVCFEREISVLLPCRRRRLCRNCS DKCKKCPICRITIEERLPYVDV - - - 466
Bra015952(Br) 379 KMPKRD LAEEVWRLQAALGEQTEITKFSQOEYERLONEKVL CRVCFEREISVLLPCRRRRLCRNCS EKCKKCPICRVPIEERLPYVDV - - - 467
LOC100791390(Gm) 378 KMPKKE LAEEVWRLQAALGEQTEITKFSQOEYERLONEKVL CRVCFEGEINVMLLPCRRRRLCSTSEKCKKCPICRSDSIAERLPYVDV - - - 466
```
